# Supplementary material for: Microbiome patterns across the gastrointestinal tract of the rabbitfish Siganus fuscescens
Source: PubMed Central journal article supplement (PMC5437856; doi:10.7717/peerj.3317), 2017-05-17
Supplement: peerj-05-3317-s001.pdf [file peerj-05-3317-s001.pdf]

**a)**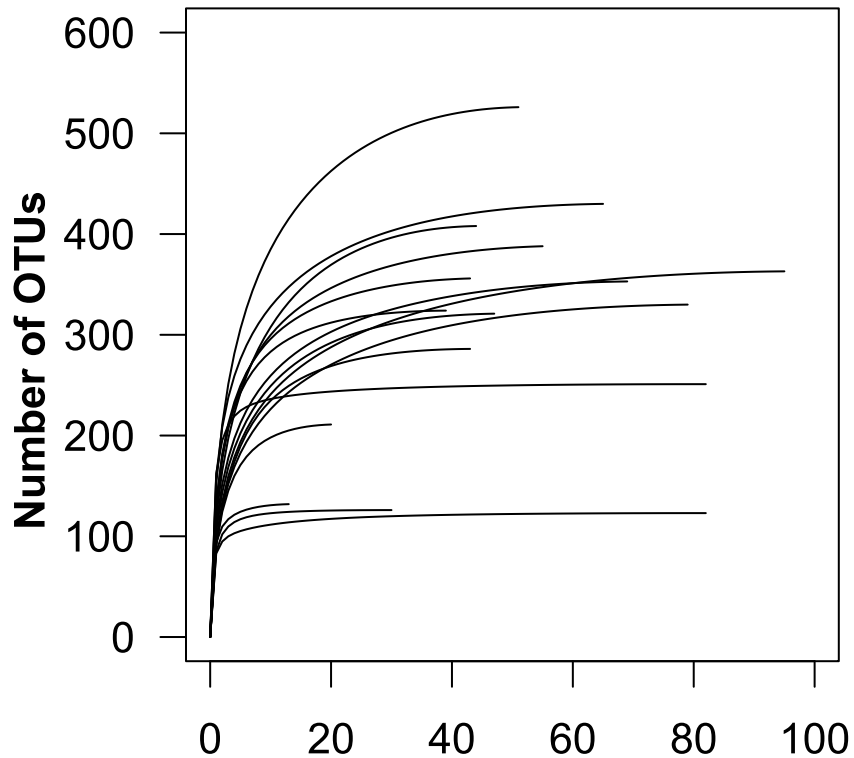**b)**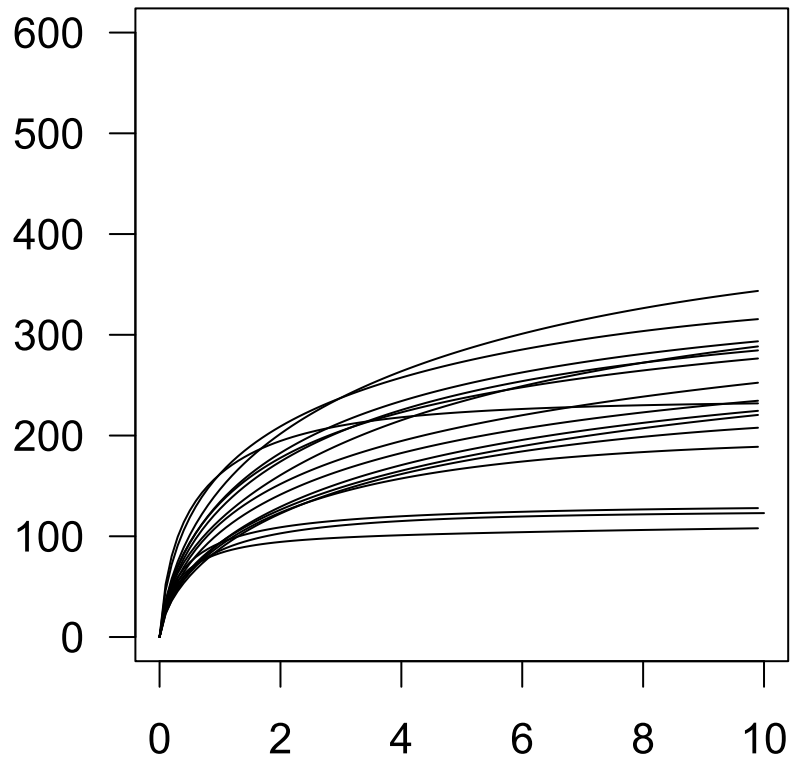**Sequences samples (x 1000)**
