# Supplementary material for: Microbiome patterns across the gastrointestinal tract of the rabbitfish Siganus fuscescens
Source: PubMed Central journal article supplement (PMC5437856; doi:10.7717/peerj.3317), 2017-05-17
Supplement: peerj-05-3317-s005.pdf [file peerj-05-3317-s005.pdf]

**Table S1.** ANOVA of a) species richness and b) species diversity, and c) PERMANOVA of species composition among Fish, Gut locations and Sites within the gut of the mottled spinefoot rabbitfish (*Siganus fuscescens*). SD = Standard deviation among fixed effect estimates (a proxy for the random effect variation among Fish).

a) ANOVA of species richness (number of OTUs observed), see Figure S3.

| <b>Source</b> | <b>Df</b> | <b>MS</b> | <b>F value</b> | <b>P</b> | <b>SD</b> |
|---------------|-----------|-----------|----------------|----------|-----------|
| Fish          | 3         | 7645      | 2.82           | 0.100    | 43.72     |
| GutLoc        | 1         | 1073      | 0.40           | 0.545    |           |
| Site          | 1         | 50288     | 18.54          | 0.002    |           |
| GutLoc:Site   | 1         | 6848      | 2.52           | 0.147    |           |
| Residuals     | 9         | 2712      |                |          |           |

b) ANOVA of Species diversity (Shannon-Weaver diversity index), see Figure 1.

| <b>Source</b> | <b>Df</b> | <b>MS</b> | <b>F value</b> | <b>P</b> | <b>SD</b> |
|---------------|-----------|-----------|----------------|----------|-----------|
| Fish          | 3         | 0.08      | 0.23           | 0.873    | 0.14      |
| GutLoc        | 1         | 0.55      | 1.64           | 0.232    |           |
| Site          | 1         | 0.64      | 1.91           | 0.200    |           |
| GutLoc:Site   | 1         | 0.03      | 0.10           | 0.759    |           |
| Residuals     | 9         | 0.33      |                |          |           |

c) PERMANOVA of Bray-Curtis dissimilarities, see Figure 2.

| <b>Source</b> | <b>Df</b> | <b>MS</b> | <b>F value</b> | <b>P</b> |
|---------------|-----------|-----------|----------------|----------|
| Fish          | 3         | 0.22      | 2.24           | 0.009    |
| GutLoc        | 1         | 0.55      | 5.67           | 0.001    |
| Site          | 1         | 0.26      | 2.72           | 0.011    |
| GutLoc:Site   | 1         | 0.14      | 1.48           | 0.133    |
| Residuals     | 9         | 0.10      |                |          |
