# Supplementary material for: Microbiome patterns across the gastrointestinal tract of the rabbitfish Siganus fuscescens
Source: PeerJ journal article supplement (doi:10.7717/peerj.3317), 2017-05-17
Supplement: SFigure2_OTU_richness.pdf [file SFigure2_OTU_richness.pdf]

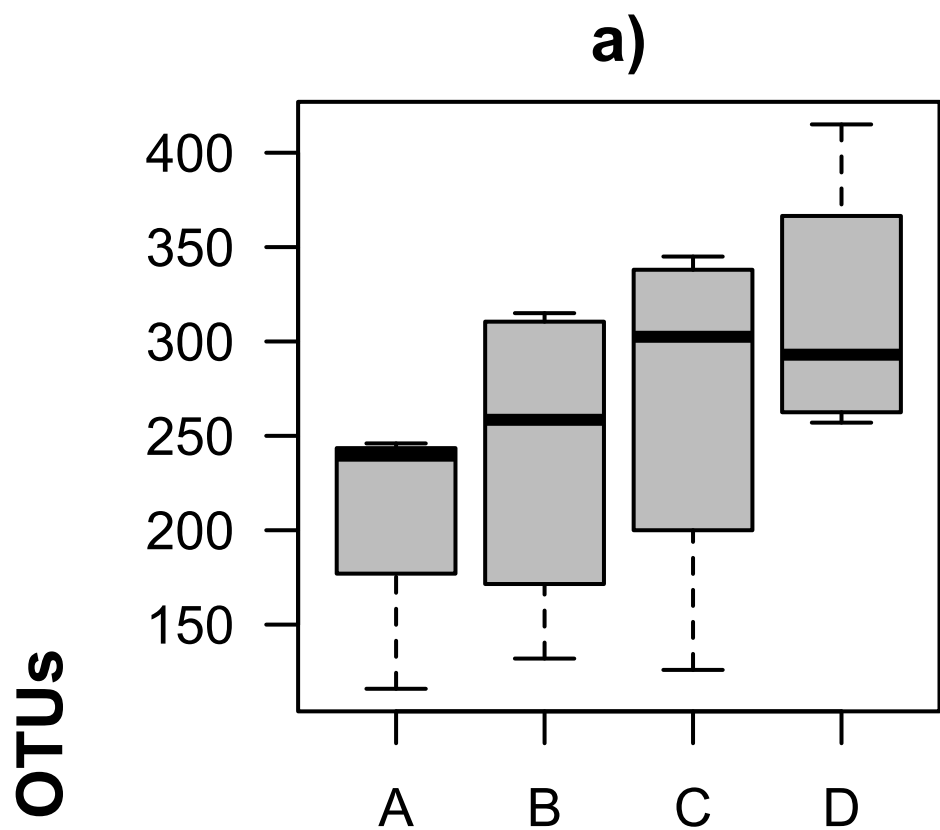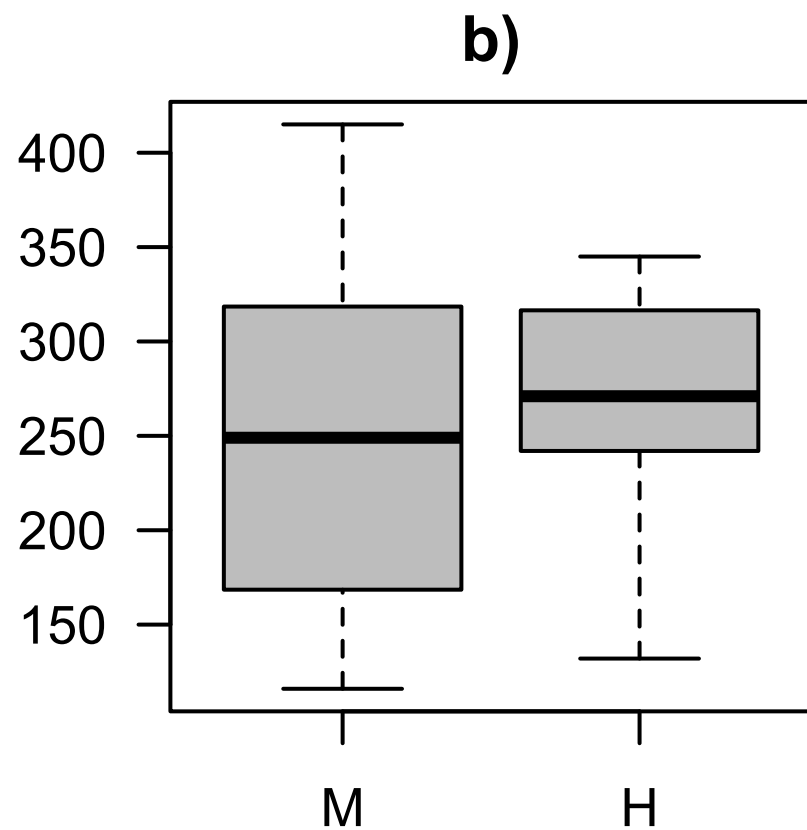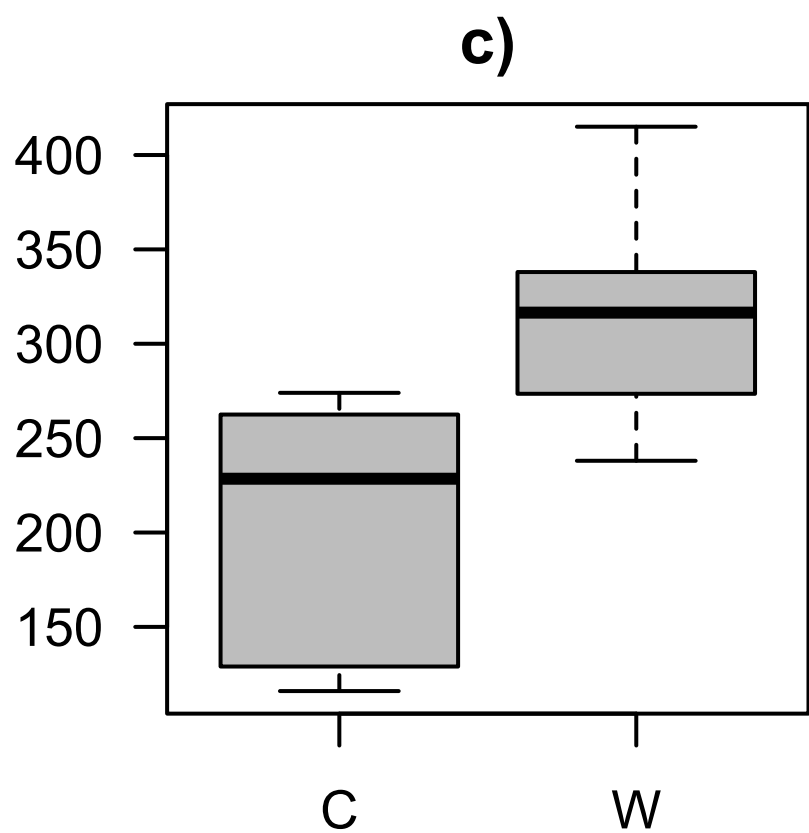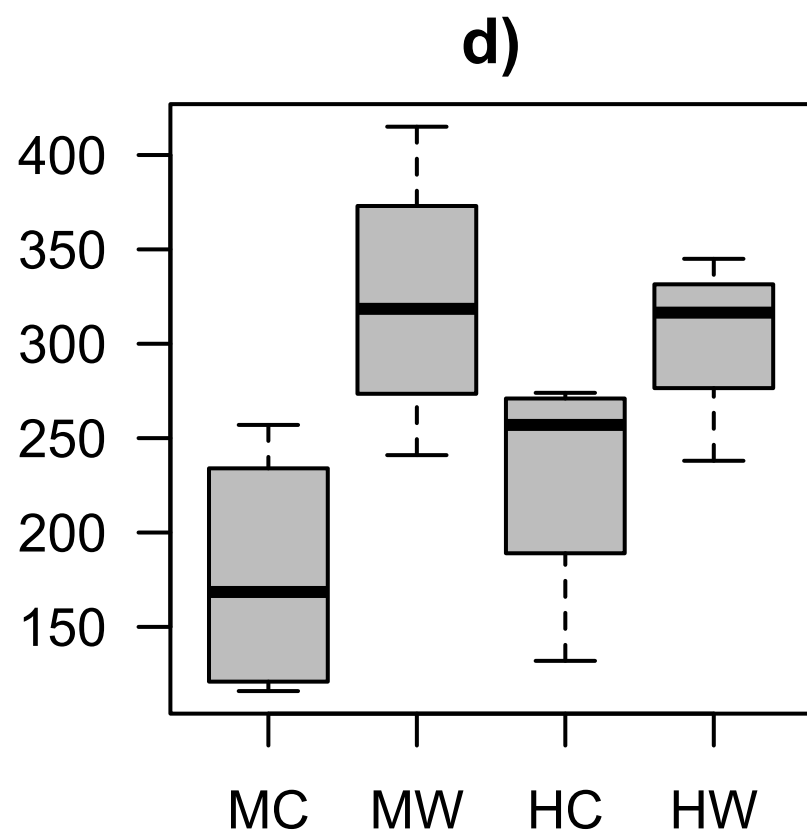

**Sample group**
