# Supplementary material for: Microbiome patterns across the gastrointestinal tract of the rabbitfish Siganus fuscescens
Source: PeerJ. 2017 May 17;5:e3317. doi: 10.7717/peerj.3317 (PMC5437856; doi:10.7717/peerj.3317)
Supplement: Table S2 — a shows the differentially abundant OTUs within the gut of the mottled spinefoot (Siganus fuscescens) among individual fish (A–D). Table S2b shows the differentially abundant OTUs within the gut of the mottled spinefoot (Siganus fuscescens) among gut locations (M = mid, H = hind). Table S2c shows the differentially abundant OTUs within the gut of the mottled spinefoot (Siganus fuscescens) among gut sites (C = content, W = wall). Table S2d shows the differentially the abundant OTUs within the gut of the mottled spinefoot (Siganus fuscescens) among gut sites within gut locations (MC = mid-content, MW = mid-wall, HC = hind-content, HW = hind-wall). P values for the interaction terms (Pvalue) and those associated with pairwise tests are shown (MCvsMW and so forth). All data was generated using negative binomial GLMs (see methods). [file peerj-05-3317-s006.xlsx]

## Sheet: Table S2a
Table S2a. Differentially abundant OTUs within the gut of the mottled spinefoot (Siganus fuscescens) among individual fish (A-D). All data was generated using negative binomial GLMs (see methods).
OTU	Taxonomy	A	B	C	D	PValue
Otu00002	k__Bacteria;p__Cyanobacteria;c__Synechococcophycideae;o__Synechococcales;f__Synechococcaceae;g__Synechococcus;	0.01107	11.0783	7.41496	6.68191	0.003
Otu00004	k__Bacteria;p__Cyanobacteria;c__Synechococcophycideae;o__Synechococcales;f__Synechococcaceae;	0.00279	6.52029	4.94528	5.33742	0.003
Otu00006	k__Bacteria;p__Planctomycetes;c__Planctomycetia;o__Pirellulales;f__Pirellulaceae;	0.00285	1.243	1.28352	1.5525	0.011
Otu00041	k__Bacteria;p__Proteobacteria;c__Deltaproteobacteria;o__Spirobacillales;	0.00103	0.528	0.31833	0.21126	0.017
Otu00051	k__Bacteria;p__Planctomycetes;c__Planctomycetia;o__Pirellulales;f__Pirellulaceae;	0	0.05672	0.17567	0.11865	0.033
Otu00052	k__Bacteria;p__Actinobacteria;c__Actinobacteria;o__Actinomycetales;	0	0.12343	0.24074	0.14207	0.01
Otu00055	k__Bacteria;p__Tenericutes;c__Mollicutes;o__RF39;	0.0633	0.15242	0.45279	0.24074	0.033
Otu00080	k__Bacteria;	0	0.4115	0.10341	0.12455	0.002
Otu00084	k__Bacteria;p__Firmicutes;c__Erysipelotrichi;o__Erysipelotrichales;f__Erysipelotrichaceae;g__Coprobacillus;s__cateniformis;	0.26217	0.20595	0.1339	0.0192	0.028
Otu00105	k__Bacteria;p__Firmicutes;c__Clostridia;o__Clostridiales;f__Peptostreptococcaceae;	0	0.74669	0.00435	0.00103	0.026
Otu00115	k__Bacteria;p__Cyanobacteria;c__Synechococcophycideae;o__Synechococcales;f__Synechococcaceae;g__Synechococcus;	0	0.03367	0.13962	0.13166	0.005
Otu00133	k__Bacteria;p__Firmicutes;c__Clostridia;o__Clostridiales;f__Ruminococcaceae;g__Ruminococcus;	0.19572	0.08108	0.01272	0.0044	0.035
Otu00162	k__Bacteria;p__Bacteroidetes;c__Bacteroidia;o__Bacteroidales;	0.00024	0.0077	0.25207	0.01451	0.01
Otu00167	k__Bacteria;p__Proteobacteria;c__Alphaproteobacteria;o__RF32;	0	0.015	0.07015	0.01686	0.006
Otu00175	k__Bacteria;p__Verrucomicrobia;c__Verruco-5;o__WCHB1-41;f__RFP12;	0	0.01369	0.06298	0.02892	0.021
Otu00176	k__Bacteria;p__Firmicutes;c__Clostridia;o__Clostridiales;f__Eubacteriaceae;g__Anaerofustis;	0.00234	0	0.03667	0.07008	0.015
Otu00183	k__Bacteria;p__Bacteroidetes;c__Bacteroidia;o__Bacteroidales;f__Porphyromonadaceae;	0.00057	0.0001	0	0	0.012
Otu00185	k__Bacteria;p__Bacteroidetes;c__Bacteroidia;o__Bacteroidales;f__Porphyromonadaceae;g__Dysgonomonas;	0.0982	0.01814	0	0	0.001
Otu00186	k__Bacteria;p__Proteobacteria;c__Gammaproteobacteria;o__Vibrionales;f__Vibrionaceae;	0	0.03459	0.05511	0.03162	0.047
Otu00189	k__Bacteria;p__Firmicutes;c__Clostridia;o__Clostridiales;	0	0.05384	0.04369	0.01014	0.005
Otu00194	k__Bacteria;p__Lentisphaerae;c__Lentisphaeria;o__Victivallales;f__Victivallaceae;	0	0	0	0.00057	0.006
Otu00200	k__Bacteria;p__Firmicutes;c__Clostridia;o__Clostridiales;f__Ruminococcaceae;	0	0.01217	0.02599	0.02697	0.032
Otu00201	k__Bacteria;p__Lentisphaerae;c__Lentisphaeria;o__Victivallales;f__Victivallaceae;	0	0	4e-05	0.00061	0.009
Otu00203	k__Bacteria;p__Firmicutes;c__Clostridia;o__Clostridiales;f__Lachnospiraceae;g__Coprococcus;	0.02801	0.00491	0	0	0.01
Otu00217	k__Bacteria;p__Bacteroidetes;c__Bacteroidia;o__Bacteroidales;f__Rikenellaceae;	0	0	0.0001	0.00032	0.013
Otu00220	k__Bacteria;p__Bacteroidetes;c__Bacteroidia;o__Bacteroidales;f__Rikenellaceae;g__PW3;	0	0	1e-05	0	0.047
Otu00231	k__Bacteria;p__Bacteroidetes;c__Bacteroidia;o__Bacteroidales;f__Rikenellaceae;	0	0.00833	0.03774	0.00538	0.034
Otu00233	k__Bacteria;p__Bacteroidetes;c__Bacteroidia;o__Bacteroidales;f__Rikenellaceae;	0	0.01374	0.01708	0.02087	0.02
Otu00235	k__Bacteria;	0	0.00013	8e-05	0.0001	0.043
Otu00237	k__Bacteria;p__Firmicutes;c__Clostridia;o__Clostridiales;f__Lachnospiraceae;g__Epulopiscium;	0	0.14281	0.0007	0	0.026
Otu00251	k__Bacteria;p__Cyanobacteria;c__4C0d-2;o__YS2;	0	0.00787	0.01921	0.02943	0.043
Otu00260	k__Bacteria;p__Firmicutes;c__Clostridia;o__Clostridiales;f__Ruminococcaceae;	0	0	0.00012	0.0001	0.035
Otu00266	k__Bacteria;p__Proteobacteria;c__Gammaproteobacteria;o__Pasteurellales;f__Pasteurellaceae;	0.00013	3e-05	0	0	0.033
Otu00272	k__Bacteria;	0.00015	0	7e-05	0	0.045
Otu00291	k__Bacteria;p__Bacteroidetes;c__Bacteroidia;o__Bacteroidales;f__Porphyromonadaceae;	0	0.02652	0.00555	0.02475	0.021
Otu00305	k__Bacteria;p__Bacteroidetes;c__Bacteroidia;o__Bacteroidales;	0.0002	0	0	1e-05	0.022
Otu00312	k__Bacteria;p__Bacteroidetes;c__Bacteroidia;o__Bacteroidales;f__Odoribacteraceae;g__Odoribacter;	0	0	0.00012	0.00013	0.009
Otu00321	k__Bacteria;p__Planctomycetes;c__Planctomycetia;o__Pirellulales;f__Pirellulaceae;	0	0	0.01129	0.02392	0.004
Otu00389	k__Bacteria;p__Proteobacteria;c__Gammaproteobacteria;o__Alteromonadales;f__Alteromonadaceae;g__Microbulbifer;s__elongatus;	0	0	0.00643	0.01902	0.005

## Sheet: Table S2b
Table S2b. Differentially abundant OTUs within the gut of the mottled spinefoot (Siganus fuscescens) among gut locations (M = mid, H = hind). All data was generated using negative binomial GLMs (see methods).
OTU	Taxonomy	M	H	PValue	Difference
Otu00001	k__Bacteria;p__Proteobacteria;c__Deltaproteobacteria;o__Desulfovibrionales;f__Desulfovibrionaceae;g__Desulfovibrio;	16.0678	47.697	0.007	31.6292
Otu00009	k__Bacteria;p__Proteobacteria;c__Gammaproteobacteria;o__Enterobacteriales;f__Enterobacteriaceae;	3.26863	0.25618	0.008	-3.01245
Otu00008	k__Bacteria;p__Firmicutes;c__Clostridia;o__Clostridiales;f__Mogibacteriaceae;	0.51842	3.23138	0.007	2.71296
Otu00012	k__Bacteria;p__Proteobacteria;c__Deltaproteobacteria;o__Desulfovibrionales;f__Desulfovibrionaceae;g__Desulfovibrio;	0.5543	1.74222	0.037	1.18792
Otu00030	k__Bacteria;p__Bacteroidetes;c__Flavobacteriia;o__Flavobacteriales;f__Flavobacteriaceae;g__Aquimarina;	1.04797	0.0506	0.004	-0.99737
Otu00007	k__Bacteria;p__Firmicutes;c__Clostridia;o__Clostridiales;f__Peptostreptococcaceae;	1.05358	0.19773	0.037	-0.85585
Otu00006	k__Bacteria;p__Planctomycetes;c__Planctomycetia;o__Pirellulales;f__Pirellulaceae;	0.89417	0.09389	0.042	-0.80028
Otu00010	k__Bacteria;p__Verrucomicrobia;c__Verrucomicrobiae;o__Verrucomicrobiales;f__Verrucomicrobiaceae;g__Akkermansia;	0.41442	1.0537	0.049	0.63928
Otu00049	k__Bacteria;p__Proteobacteria;c__Gammaproteobacteria;o__Pseudomonadales;f__Moraxellaceae;g__Acinetobacter;	0.53147	0.00088	0.002	-0.53059
Otu00033	k__Bacteria;p__Spirochaetes;c__Spirochaetes;o__Spirochaetales;f__Spirochaetaceae;g__Treponema;	0.10273	0.62322	0.038	0.52049
Otu00037	k__Bacteria;p__Firmicutes;c__Bacilli;o__Bacillales;f__Staphylococcaceae;g__Staphylococcus;	0.55171	0.03863	0.009	-0.51308
Otu00063	k__Bacteria;p__Planctomycetes;c__Planctomycetia;o__Pirellulales;f__Pirellulaceae;	0.43693	0.04017	0.011	-0.39676
Otu00046	k__Bacteria;p__Proteobacteria;c__Deltaproteobacteria;o__Desulfovibrionales;f__Desulfovibrionaceae;g__Desulfovibrio;	0.0803	0.44617	0.026	0.36587
Otu00041	k__Bacteria;p__Proteobacteria;c__Deltaproteobacteria;o__Spirobacillales;	0.27597	0.02196	0.037	-0.25401
Otu00103	k__Bacteria;p__Bacteroidetes;c__Flavobacteriia;o__Flavobacteriales;f__Flavobacteriaceae;g__Aquimarina;	0.2544	0.01443	0.01	-0.23997
Otu00086	k__Bacteria;p__Proteobacteria;	0.02896	0.25244	0.002	0.22348
Otu00077	k__Bacteria;p__Firmicutes;c__Bacilli;o__Lactobacillales;f__Streptococcaceae;g__Streptococcus;s__infantis;	0.22015	0.00506	0.04	-0.21509
Otu00055	k__Bacteria;p__Tenericutes;c__Mollicutes;o__RF39;	0.11471	0.2827	0.033	0.16799
Otu00011	k__Bacteria;p__Cyanobacteria;	0.15244	0.00298	0.002	-0.14946
Otu00095	k__Bacteria;p__Proteobacteria;	0.02508	0.17437	0.006	0.14929
Otu00157	k__Bacteria;p__Bacteroidetes;	0	0.12459	0.012	0.12459
Otu00129	k__Bacteria;p__Bacteroidetes;c__Bacteroidia;o__Bacteroidales;f__Odoribacteraceae;g__Odoribacter;	0	0.12381	0.013	0.12381
Otu00079	k__Bacteria;p__Proteobacteria;c__Gammaproteobacteria;o__Pseudomonadales;f__Pseudomonadaceae;g__Pseudomonas;	0.12062	0.00191	0.004	-0.11871
Otu00130	k__Bacteria;p__Bacteroidetes;	0.01271	0.12608	0.015	0.11337
Otu00068	k__Bacteria;p__Bacteroidetes;	0	0.10662	0.037	0.10662
Otu00123	k__Bacteria;p__Proteobacteria;	0	0.10458	0.004	0.10458
Otu00171	k__Bacteria;p__Actinobacteria;c__Actinobacteria;o__Actinomycetales;f__Microbacteriaceae;g__Curtobacterium;	0.1106	0.0095	0.016	-0.1011
Otu00276	k__Bacteria;p__Actinobacteria;c__Actinobacteria;o__Actinomycetales;f__Micrococcaceae;g__Micrococcus;s__luteus;	0.09088	0.00158	0.034	-0.0893
Otu00148	k__Bacteria;p__Bacteroidetes;	0	0.08192	0.036	0.08192
Otu00207	k__Bacteria;p__Bacteroidetes;	0	0.07232	0.034	0.07232
Otu00153	k__Bacteria;p__Spirochaetes;c__Spirochaetes;o__Spirochaetales;f__Spirochaetaceae;	0	0.06289	0.033	0.06289
Otu00192	k__Bacteria;p__Actinobacteria;c__Actinobacteria;o__Actinomycetales;f__Corynebacteriaceae;g__Corynebacterium;	0.06118	0.0047	0.016	-0.05648
Otu00204	k__Bacteria;p__Actinobacteria;c__Actinobacteria;o__Actinomycetales;f__Propionibacteriaceae;g__Propionibacterium;s__acnes;	0.05967	0.00328	0.021	-0.05639
Otu00181	k__Bacteria;p__Firmicutes;c__Bacilli;o__Bacillales;f__Bacillaceae;	0.0574	0.00103	0.018	-0.05637
Otu00121	k__Bacteria;p__Firmicutes;c__Clostridia;o__Clostridiales;f__Ruminococcaceae;	0.00534	0.06074	0.007	0.0554
Otu00125	k__Bacteria;p__Firmicutes;c__Clostridia;o__Clostridiales;f__Mogibacteriaceae;	0	0.0502	0.021	0.0502
Otu00222	k__Bacteria;p__Spirochaetes;	0	0.04837	0.043	0.04837
Otu00182	k__Bacteria;p__Firmicutes;c__Clostridia;o__Clostridiales;f__Christensenellaceae;	0.0098	0.05409	0.011	0.04429
Otu00258	k__Bacteria;p__Proteobacteria;c__Deltaproteobacteria;o__Desulfovibrionales;f__Desulfovibrionaceae;g__Desulfovibrio;	0	0.04171	0.004	0.04171
Otu00247	k__Bacteria;p__Actinobacteria;c__Actinobacteria;o__Actinomycetales;f__Corynebacteriaceae;g__Corynebacterium;	0.04439	0.00382	0.006	-0.04057
Otu00135	k__Bacteria;p__Firmicutes;c__Clostridia;o__Clostridiales;f__Lachnospiraceae;g__Epulopiscium;	0.04735	0.01136	0.039	-0.03599
Otu00211	k__Bacteria;p__Bacteroidetes;c__Bacteroidia;o__Bacteroidales;	0	0.03587	0.025	0.03587
Otu00262	k__Bacteria;p__Bacteroidetes;	0	0.02992	0.032	0.02992
Otu00151	k__Bacteria;p__Cyanobacteria;	0.02772	0.00076	0.007	-0.02696
Otu00289	k__Bacteria;p__Proteobacteria;c__Deltaproteobacteria;o__Desulfovibrionales;f__Desulfovibrionaceae;	0.00082	0.02508	0.003	0.02426
Otu00017	k__Bacteria;p__Firmicutes;c__Clostridia;o__Clostridiales;f__Lachnospiraceae;	0.02047	0.00015	0.022	-0.02032
Otu00287	k__Bacteria;p__Firmicutes;c__Clostridia;o__Clostridiales;f__Ruminococcaceae;g__Ruminococcus;	0	0.01947	0.009	0.01947
Otu00190	k__Bacteria;p__Firmicutes;c__Clostridia;o__Clostridiales;f__Lachnospiraceae;	0.02393	0.0046	0.031	-0.01933
Otu00315	k__Bacteria;p__Bacteroidetes;c__Bacteroidia;o__Bacteroidales;f__Odoribacteraceae;g__Odoribacter;	0	0.01867	0.01	0.01867
Otu00226	k__Bacteria;p__Bacteroidetes;	0	0.01498	0.001	0.01498
Otu00284	k__Bacteria;p__Firmicutes;c__Clostridia;o__Clostridiales;f__Ruminococcaceae;g__Oscillospira;	0	0.01131	0.025	0.01131
Otu00052	k__Bacteria;p__Actinobacteria;c__Actinobacteria;o__Actinomycetales;	0.00196	6e-05	0.001	-0.0019
Otu00080	k__Bacteria;	0.00157	8e-05	0.006	-0.00149
Otu00051	k__Bacteria;p__Planctomycetes;c__Planctomycetia;o__Pirellulales;f__Pirellulaceae;	0.00118	3e-05	0.004	-0.00115
Otu00112	k__Bacteria;	0.00091	1e-05	0.003	-0.0009
Otu00115	k__Bacteria;p__Cyanobacteria;c__Synechococcophycideae;o__Synechococcales;f__Synechococcaceae;g__Synechococcus;	0.00064	7e-05	0.018	-0.00057
Otu00189	k__Bacteria;p__Firmicutes;c__Clostridia;o__Clostridiales;	4e-05	0.00034	0.013	0.0003
Otu00176	k__Bacteria;p__Firmicutes;c__Clostridia;o__Clostridiales;f__Eubacteriaceae;g__Anaerofustis;	2e-05	0.00029	0.004	0.00027
Otu00200	k__Bacteria;p__Firmicutes;c__Clostridia;o__Clostridiales;f__Ruminococcaceae;	3e-05	0.00025	0.01	0.00022
Otu00294	k__Bacteria;	0.00016	0	0.002	-0.00016
Otu00277	k__Bacteria;p__Firmicutes;c__Bacilli;o__Bacillales;f__Planococcaceae;	0.00014	0	0.001	-0.00014
Otu00314	k__Bacteria;p__Proteobacteria;c__Gammaproteobacteria;	0.00014	0	0.014	-0.00014
Otu00251	k__Bacteria;p__Cyanobacteria;c__4C0d-2;o__YS2;	2e-05	0.00015	0.049	0.00013
Otu00346	k__Bacteria;p__Cyanobacteria;	0.00011	0	0.017	-0.00011
Otu00376	k__Bacteria;p__Bacteroidetes;c__Bacteroidia;o__Bacteroidales;f__Rikenellaceae;g__AF12;	0	0.0001	0.044	0.0001
Otu00324	k__Bacteria;p__Verrucomicrobia;c__Verrucomicrobiae;o__Verrucomicrobiales;f__Verrucomicrobiaceae;	0	9e-05	0.005	9e-05
Otu00335	k__Bacteria;p__Firmicutes;	0	8e-05	0.02	8e-05
Otu00383	k__Bacteria;p__Planctomycetes;c__Planctomycetia;o__Pirellulales;f__Pirellulaceae;	8e-05	0	0.009	-8e-05
Otu00422	k__Bacteria;p__Cyanobacteria;	7e-05	0	0.011	-7e-05
Otu00307	k__Bacteria;p__Firmicutes;c__Clostridia;o__Clostridiales;f__Ruminococcaceae;	0	4e-05	0.023	4e-05
Otu00244	k__Archaea;p__Euryarchaeota;c__Methanomicrobia;	3e-05	0	0.007	-3e-05
Otu00197	k__Bacteria;p__Actinobacteria;c__Actinobacteria;o__Actinomycetales;	1e-05	0	0.011	-1e-05

## Sheet: Table S2c
Table S2c. Differentially abundant OTUs within the gut of the mottled spinefoot (Siganus fuscescens) among gut sites (C = content, W = wall). All data was generated using negative binomial GLMs (see methods).
OTU	NoUnClTax	C	W	PValue	Difference
Otu00005	k__Bacteria;p__Firmicutes;c__Clostridia;o__Clostridiales;f__Clostridiaceae;g__Clostridium;	0.12203	1.91891	0.003	1.79688
Otu00007	k__Bacteria;p__Firmicutes;c__Clostridia;o__Clostridiales;f__Peptostreptococcaceae;	0.20708	1.00602	0.019	0.79894
Otu00025	k__Bacteria;p__Firmicutes;c__Clostridia;o__Clostridiales;f__Peptostreptococcaceae;	0.04456	0.82632	0.016	0.78176
Otu00036	k__Bacteria;p__Firmicutes;c__Clostridia;o__Clostridiales;f__Peptostreptococcaceae;	0.01553	0.75398	0.003	0.73845
Otu00018	k__Bacteria;p__Bacteroidetes;c__Bacteroidia;o__Bacteroidales;f__Porphyromonadaceae;g__Parabacteroides;s__gordonii;	0.44251	1.14182	0.023	0.69931
Otu00024	k__Bacteria;p__Bacteroidetes;c__Bacteroidia;o__Bacteroidales;f__Rikenellaceae;	0.10067	0.70933	0.028	0.60866
Otu00023	k__Bacteria;p__Bacteroidetes;	0.20607	0.80731	0.023	0.60124
Otu00019	k__Bacteria;p__Firmicutes;c__Clostridia;o__Clostridiales;f__Clostridiaceae;g__Clostridium;s__perfringens;	0.01453	0.5925	0.002	0.57797
Otu00014	k__Bacteria;p__Firmicutes;c__Clostridia;o__Clostridiales;f__Lachnospiraceae;	0.01062	0.49193	0.035	0.48131
Otu00048	k__Bacteria;p__Firmicutes;c__Clostridia;o__Clostridiales;f__Lachnospiraceae;g__Epulopiscium;	0.0438	0.49337	0.006	0.44957
Otu00028	k__Bacteria;p__Firmicutes;c__Clostridia;o__Clostridiales;	0.0208	0.4614	0.005	0.4406
Otu00039	k__Bacteria;p__Firmicutes;c__Clostridia;o__Clostridiales;f__Lachnospiraceae;g__Coprococcus;	0.00365	0.36277	0.004	0.35912
Otu00054	k__Bacteria;	0.4106	0.09443	0.003	-0.31617
Otu00042	k__Bacteria;p__Firmicutes;c__Clostridia;o__Clostridiales;f__Ruminococcaceae;g__Oscillospira;	0.08498	0.39662	0.009	0.31164
Otu00060	k__Bacteria;p__Firmicutes;c__Clostridia;o__Clostridiales;	0.03417	0.29907	0.039	0.2649
Otu00058	k__Bacteria;p__Firmicutes;c__Clostridia;o__Clostridiales;f__Ruminococcaceae;g__Ruminococcus;	0.04143	0.2523	0.011	0.21087
Otu00061	k__Bacteria;p__Firmicutes;c__Clostridia;o__Clostridiales;f__Ruminococcaceae;	0.05611	0.25766	0.033	0.20155
Otu00062	k__Bacteria;p__Proteobacteria;	0.04351	0.2392	0.018	0.19569
Otu00059	k__Bacteria;p__Firmicutes;c__Clostridia;o__Clostridiales;f__Clostridiaceae;g__Clostridium;	0.00691	0.18285	0.004	0.17594
Otu00099	k__Bacteria;	0.02405	0.19356	0.026	0.16951
Otu00110	k__Bacteria;p__Firmicutes;c__Clostridia;o__Clostridiales;f__Ruminococcaceae;g__Anaerofilum;	0.01314	0.16081	0.017	0.14767
Otu00067	k__Bacteria;p__Firmicutes;c__Bacilli;o__Turicibacterales;f__Turicibacteraceae;g__Turicibacter;	0.01874	0.16604	0.005	0.1473
Otu00098	k__Bacteria;p__Bacteroidetes;c__Bacteroidia;o__Bacteroidales;f__Rikenellaceae;g__AF12;	0.02252	0.15109	0.022	0.12857
Otu00094	k__Bacteria;p__Firmicutes;c__Clostridia;o__Clostridiales;f__Lachnospiraceae;	0.02675	0.12417	0.01	0.09742
Otu00092	k__Bacteria;p__Firmicutes;c__Clostridia;o__Clostridiales;f__Clostridiaceae;g__Clostridium;s__subterminale;	0.00608	0.09081	0.006	0.08473
Otu00126	k__Bacteria;p__Firmicutes;c__Clostridia;o__Clostridiales;	0.00355	0.06898	0.004	0.06543
Otu00232	k__Bacteria;p__Proteobacteria;c__Alphaproteobacteria;o__RF32;	0.00412	0.05953	0.036	0.05541
Otu00066	k__Bacteria;p__Firmicutes;c__Clostridia;o__Clostridiales;f__Lachnospiraceae;g__Coprococcus;	0.00293	0.05794	0.009	0.05501
Otu00155	k__Bacteria;p__Proteobacteria;c__Gammaproteobacteria;o__Oceanospirillales;f__Halomonadaceae;g__Halomonas;	0	0.05205	0.003	0.05205
Otu00143	k__Bacteria;p__Firmicutes;c__Clostridia;o__Clostridiales;f__Ruminococcaceae;g__Anaerofilum;	0.00659	0.05718	0.044	0.05059
Otu00148	k__Bacteria;p__Bacteroidetes;	0	0.05039	0.033	0.05039
Otu00156	k__Bacteria;p__Firmicutes;c__Clostridia;o__Clostridiales;f__Ruminococcaceae;g__Ruminococcus;	0.00757	0.0553	0.037	0.04773
Otu00133	k__Bacteria;p__Firmicutes;c__Clostridia;o__Clostridiales;f__Ruminococcaceae;g__Ruminococcus;	0.01555	0.06063	0.021	0.04508
Otu00079	k__Bacteria;p__Proteobacteria;c__Gammaproteobacteria;o__Pseudomonadales;f__Pseudomonadaceae;g__Pseudomonas;	0.04569	0.00503	0.038	-0.04066
Otu00138	k__Bacteria;p__Firmicutes;c__Clostridia;o__Clostridiales;	0	0.03859	0.002	0.03859
Otu00135	k__Bacteria;p__Firmicutes;c__Clostridia;o__Clostridiales;f__Lachnospiraceae;g__Epulopiscium;	0.01159	0.04644	0.009	0.03485
Otu00125	k__Bacteria;p__Firmicutes;c__Clostridia;o__Clostridiales;f__Mogibacteriaceae;	0	0.03304	0.037	0.03304
Otu00219	k__Bacteria;p__Bacteroidetes;c__Bacteroidia;o__Bacteroidales;f__Rikenellaceae;	0	0.03187	0.038	0.03187
Otu00166	k__Bacteria;p__Firmicutes;c__Clostridia;o__Clostridiales;f__Clostridiaceae;g__Clostridium;	0.00349	0.03296	0.019	0.02947
Otu00164	k__Bacteria;p__Bacteroidetes;c__Bacteroidia;o__Bacteroidales;	0	0.02284	0.041	0.02284
Otu00196	k__Bacteria;p__Proteobacteria;c__Gammaproteobacteria;o__Vibrionales;f__Vibrionaceae;g__Photobacterium;s__angustum;	0.00184	0.02109	0.037	0.01925
Otu00259	k__Bacteria;p__Firmicutes;	0	0.01372	0.032	0.01372
Otu00263	k__Bacteria;	0.00112	0.01425	0.04	0.01313
Otu00284	k__Bacteria;p__Firmicutes;c__Clostridia;o__Clostridiales;f__Ruminococcaceae;g__Oscillospira;	0	0.00869	0.028	0.00869
Otu00051	k__Bacteria;p__Planctomycetes;c__Planctomycetia;o__Pirellulales;f__Pirellulaceae;	0.00043	8e-05	0.042	-0.00035
Otu00231	k__Bacteria;p__Bacteroidetes;c__Bacteroidia;o__Bacteroidales;f__Rikenellaceae;	1e-05	0.00019	0.009	0.00018
Otu00233	k__Bacteria;p__Bacteroidetes;c__Bacteroidia;o__Bacteroidales;f__Rikenellaceae;	3e-05	0.00021	0.025	0.00018
Otu00210	k__Bacteria;p__Firmicutes;c__Clostridia;o__Clostridiales;	0	0.00013	0.011	0.00013
Otu00173	k__Bacteria;p__Proteobacteria;	0	0.00012	0.046	0.00012
Otu00238	k__Bacteria;p__Firmicutes;c__Clostridia;o__Clostridiales;f__Ruminococcaceae;g__Ruminococcus;	0	9e-05	0.016	9e-05
Otu00308	k__Bacteria;p__Firmicutes;c__Clostridia;o__Clostridiales;f__Clostridiaceae;	0	8e-05	0.021	8e-05
Otu00200	k__Bacteria;p__Firmicutes;c__Clostridia;o__Clostridiales;f__Ruminococcaceae;	6e-05	0.00012	0.048	6e-05
Otu00260	k__Bacteria;p__Firmicutes;c__Clostridia;o__Clostridiales;f__Ruminococcaceae;	0	4e-05	0.03	4e-05
Otu00230	k__Bacteria;p__Firmicutes;c__Clostridia;o__Clostridiales;f__Ruminococcaceae;g__Ruminococcus;	0	3e-05	0.012	3e-05
Otu00307	k__Bacteria;p__Firmicutes;c__Clostridia;o__Clostridiales;f__Ruminococcaceae;	0	3e-05	0.003	3e-05
Otu00240	k__Bacteria;p__Proteobacteria;c__Gammaproteobacteria;o__Vibrionales;f__Pseudoalteromonadaceae;g__Pseudoalteromonas;s__tunicata;	2e-05	0	0.039	-2e-05

## Sheet: Table S2d
Table S2d. Differentially abundant OTUs within the gut of the mottled spinefoot (Siganus fuscescens) among gut sites within gut locations (MC = mid-content, MW = mid-wall, HC = hind-content, HW = hind-wall). P values for the interaction terms (Pvalue) and those associated with pairwise tests are shown (MCvsMW and so forth). All data was generated using negative binomial GLMs (see methods).
OTU	Taxonomy	MC	HC	MW	HW	PValue	MCvsMW	HCvsHW	MCvsHC	MWvsHW	Group
Otu00083	k__Bacteria;p__Verrucomicrobia;	0.01874	0.37327	0.05869	0.08136	0.02	0.068	0.099	0.003	0.54	FFTF
Otu00101	k__Bacteria;p__Proteobacteria;c__Alphaproteobacteria;o__Rhodobacterales;f__Rhodobacteraceae;	0.31204	0	0.0171	0.00157	0.017	0.276	0.001	0.001	0.174	FTTF
Otu00154	k__Bacteria;p__Verrucomicrobia;c__Verrucomicrobiae;o__Verrucomicrobiales;f__Verrucomicrobiaceae;g__Rubritalea;	0.21506	0	0.00202	0.00017	0.042	0.081	0.005	0.001	0.113	FTTF
Otu00191	k__Bacteria;p__Firmicutes;c__Clostridia;o__Clostridiales;f__Lachnospiraceae;g__Epulopiscium;	0.0006	0.00107	0.01431	0.00196	0.042	0.001	0.306	0.184	0.001	TFFT
Otu00003	k__Bacteria;p__Proteobacteria;c__Deltaproteobacteria;o__Desulfarculales;f__Desulfarculaceae;	0.81118	9.56832	2.29908	4.0452	0.005	0.009	0.1	0.001	0.189	TFTF
Otu00016	k__Bacteria;p__Bacteroidetes;c__Bacteroidia;o__Bacteroidales;f__Rikenellaceae;	0.00652	0.55494	0.97567	1.38027	0.008	0.001	0.3	0.001	0.626	TFTF
Otu00031	k__Bacteria;p__Firmicutes;c__Clostridia;o__Clostridiales;f__Ruminococcaceae;	0.0047	0.14151	0.59192	0.57231	0.043	0.001	0.099	0.004	0.906	TFTF
Otu00034	k__Bacteria;p__Bacteroidetes;c__Bacteroidia;o__Bacteroidales;f__Rikenellaceae;g__PW3;	0.01399	0.32252	0.54467	0.60568	0.047	0.001	0.298	0.003	0.775	TFTF
Otu00047	k__Bacteria;p__Firmicutes;c__Clostridia;o__Clostridiales;f__Ruminococcaceae;	0.03606	0.68039	0.15513	0.08886	0.02	0.041	0.068	0.004	0.589	TFTF
Otu00056	k__Bacteria;p__Firmicutes;c__Clostridia;o__Clostridiales;f__Ruminococcaceae;g__Anaerofilum;	0.0049	0.1826	0.31714	0.29283	0.008	0.002	0.477	0.001	0.981	TFTF
Otu00064	k__Bacteria;p__Bacteroidetes;c__Bacteroidia;o__Bacteroidales;f__Rikenellaceae;	0	0.08778	0.28153	0.15959	0.002	0.001	0.216	0.001	0.601	TFTF
Otu00072	k__Bacteria;p__Firmicutes;c__Clostridia;o__Clostridiales;f__Christensenellaceae;	0	0.09694	0.24817	0.17091	0.002	0.001	0.479	0.001	0.785	TFTF
Otu00085	k__Bacteria;p__Firmicutes;c__Clostridia;o__Clostridiales;f__Ruminococcaceae;g__Oscillospira;	0.00494	0.07667	0.15817	0.27237	0.023	0.001	0.073	0.001	0.35	TFTF
Otu00091	k__Bacteria;p__Firmicutes;c__Clostridia;o__Clostridiales;f__Lachnospiraceae;	0	0.07778	0.10121	0.10937	0.001	0.001	0.236	0.001	0.635	TFTF
Otu00097	k__Bacteria;p__Bacteroidetes;c__Bacteroidia;o__Bacteroidales;f__Rikenellaceae;	0	0.01079	0.14946	0.09676	0.021	0.001	0.055	0.001	0.75	TFTF
Otu00104	k__Bacteria;p__Bacteroidetes;c__Bacteroidia;o__Bacteroidales;f__Rikenellaceae;g__AF12;	0.00095	0.05374	0.08999	0.12901	0.011	0.001	0.129	0.001	0.433	TFTF
Otu00106	k__Bacteria;p__Firmicutes;c__Clostridia;o__Clostridiales;f__Ruminococcaceae;g__Oscillospira;	0.00455	0.06886	0.14833	0.09892	0.027	0.003	0.571	0.001	0.745	TFTF
Otu00107	k__Bacteria;p__Firmicutes;c__Clostridia;o__Clostridiales;f__Ruminococcaceae;	0.00481	0.07435	0.2106	0.14255	0.04	0.001	0.354	0.004	0.84	TFTF
Otu00108	k__Bacteria;p__Proteobacteria;	0.01704	0.21474	0.084	0.10257	0.026	0.018	0.395	0.004	0.755	TFTF
Otu00109	k__Bacteria;p__Firmicutes;c__Clostridia;	0.00525	0.10128	0.09672	0.09996	0.049	0.008	0.981	0.009	0.89	TFTF
Otu00114	k__Bacteria;p__Firmicutes;c__Clostridia;o__Clostridiales;f__Tissierellaceae;g__Sedimentibacter;	0.00836	0.18844	0.06392	0.09135	0.001	0.001	0.298	0.001	0.324	TFTF
Otu00117	k__Bacteria;p__Firmicutes;c__Clostridia;o__Clostridiales;	0	0.04626	0.10087	0.13722	0.006	0.001	0.125	0.001	0.585	TFTF
Otu00119	k__Bacteria;p__Bacteroidetes;	0	0.17703	0.01682	0.14809	0.041	0.001	0.854	0.001	0.102	TFTF
Otu00136	k__Bacteria;p__Firmicutes;c__Clostridia;o__Clostridiales;	0.00234	0.06824	0.12956	0.09833	0.033	0.001	0.321	0.002	0.978	TFTF
Otu00137	k__Bacteria;	0.00256	0.09227	0.08945	0.11327	0.009	0.001	0.467	0.001	0.592	TFTF
Otu00142	k__Bacteria;p__Firmicutes;c__Clostridia;o__Clostridiales;f__Ruminococcaceae;	0.00605	0.04385	0.12809	0.04743	0.027	0.002	0.797	0.006	0.225	TFTF
Otu00152	k__Bacteria;p__Bacteroidetes;	0	0.1119	0.03502	0.07987	0.028	0.001	0.733	0.001	0.389	TFTF
Otu00169	k__Bacteria;p__Bacteroidetes;c__Bacteroidia;o__Bacteroidales;f__Rikenellaceae;	0	0.00783	0.13903	0.01387	0.038	0.001	0.691	0.001	0.213	TFTF
Otu00199	k__Bacteria;p__Proteobacteria;c__Deltaproteobacteria;o__Desulfovibrionales;f__Desulfovibrionaceae;g__Bilophila;	0	0.0283	0.04106	0.04805	0.008	0.001	0.364	0.001	0.775	TFTF
Otu00206	k__Bacteria;p__Firmicutes;c__Clostridia;o__Clostridiales;f__Ruminococcaceae;	0	0.05327	0.01219	0.03058	0.035	0.001	0.625	0.001	0.377	TFTF
Otu00209	k__Bacteria;p__Actinobacteria;c__Coriobacteriia;o__Coriobacteriales;f__Coriobacteriaceae;g__Adlercreutzia;	0	0.03529	0.00944	0.02039	0.04	0.001	0.628	0.001	0.397	TFTF
Otu00214	k__Bacteria;p__Firmicutes;c__Clostridia;o__Clostridiales;f__Ruminococcaceae;	0	0.01908	0.04244	0.05811	0.043	0.001	0.272	0.001	0.655	TFTF
Otu00218	k__Bacteria;p__Firmicutes;c__Clostridia;o__Clostridiales;f__Lachnospiraceae;	0	0.03907	0.01618	0.04099	0.03	0.001	0.914	0.001	0.325	TFTF
Otu00221	k__Bacteria;p__Firmicutes;c__Clostridia;o__Clostridiales;f__Lachnospiraceae;g__Epulopiscium;	0	0.01615	0.03142	0.03057	0.003	0.001	0.382	0.001	0.997	TFTF
Otu00223	k__Bacteria;p__Firmicutes;c__Clostridia;o__Clostridiales;f__Ruminococcaceae;g__Ruminococcus;	0	0.01057	0.04041	0.02348	0.037	0.001	0.395	0.001	0.699	TFTF
Otu00236	k__Bacteria;p__Fusobacteria;c__Fusobacteriia;o__Fusobacteriales;f__Fusobacteriaceae;g__Fusobacterium;	0	0.03489	0.01385	0.0511	0.027	0.001	0.646	0.001	0.112	TFTF
Otu00243	k__Bacteria;p__Proteobacteria;c__Deltaproteobacteria;o__Desulfovibrionales;	0	0.01834	0.05564	0.01856	0.034	0.001	0.933	0.001	0.466	TFTF
Otu00252	k__Bacteria;p__Firmicutes;c__Clostridia;o__Clostridiales;f__Ruminococcaceae;	0	0.03129	0.01167	0.02244	0.018	0.001	0.88	0.001	0.296	TFTF
Otu00256	k__Bacteria;p__Firmicutes;c__Clostridia;o__Clostridiales;f__Ruminococcaceae;	0	0.02762	0.0152	0.02855	0.023	0.001	0.961	0.001	0.374	TFTF
Otu00268	k__Bacteria;p__Firmicutes;c__Clostridia;o__Clostridiales;	0.00129	0.01369	0.03795	0.01015	0.037	0.003	0.81	0.005	0.232	TFTF
Otu00296	k__Bacteria;p__Proteobacteria;c__Epsilonproteobacteria;o__Campylobacterales;f__Campylobacteraceae;g__Arcobacter;	0	0.02012	0.00379	0.01265	0.044	0.001	0.582	0.001	0.182	TFTF
Otu00168	k__Bacteria;p__Fibrobacteres;c__TG3;o__TG3-2;	0	0.00759	0.05621	0.00689	0.011	0.001	0.441	0.001	0.001	TFTT
Otu00229	k__Bacteria;	0	0.02056	0.00627	0.02576	0.01	0.001	0.548	0.001	0.001	TFTT
Otu00279	k__Bacteria;p__Tenericutes;c__Mollicutes;o__RF39;	0	0.00015	2e-05	9e-05	0.006	0.001	0.203	0.001	0.001	TFTT
Otu00300	k__Bacteria;p__Tenericutes;c__Mollicutes;o__RF39;	0	0.01936	0.00528	0.01598	0.002	0.001	0.884	0.001	0.003	TFTT
Otu00144	k__Bacteria;p__Firmicutes;c__Clostridia;o__Clostridiales;f__Lachnospiraceae;	0.0007	0.00087	0.07108	0.00454	0.002	0.001	0.001	0.426	0.001	TTFT
Otu00217	k__Bacteria;p__Bacteroidetes;c__Bacteroidia;o__Bacteroidales;f__Rikenellaceae;	0	4e-05	4e-05	0.00011	0.001	0.001	0.001	0.001	0.001	TTTT
Otu00234	k__Bacteria;p__Planctomycetes;c__Planctomycetia;o__Pirellulales;f__Pirellulaceae;	0.00048	0	0.00017	1e-05	0.004	0.001	0.001	0.001	0.001	TTTT
